# Supplementary material for: Transcriptional Response to Lactic Acid Stress in the Hybrid Yeast Zygosaccharomyces parabailii
Source: PubMed Central journal article supplement (PMC5812937; doi:10.1128/aem.02294-17), 2018-02-14
Supplement: AEM.02294-17_zam005188353s1.pdf [file AEM.02294-17_zam005188353s1.pdf]

## Supplemental Material

### Transcriptional response to lactic acid stress in the hybrid yeast *Zygosaccharomyces parabailii*

Raúl A. Ortiz-Merino<sup>a</sup>, Nurzhan Kuanyshev<sup>b,c</sup>, Kevin P. Byrne<sup>a</sup>, Javier A. Varela<sup>c</sup>, John P. Morrissey<sup>c</sup>, Danilo Porro<sup>b</sup>, Kenneth H. Wolfe<sup>a</sup>, Paola Branduardi<sup>b#</sup>

UCD Conway Institute, School of Medicine, University College Dublin, Dublin, Ireland<sup>a</sup>;

Department of Biotechnology and Biosciences, University of Milano-Bicocca, Milano, Italy<sup>b</sup>;

School of Microbiology/Centre for Synthetic Biology and Biotechnology/Environmental

Research Institute/APC Microbiome Institute, University College Cork, Cork, Ireland<sup>c</sup>

#Address correspondence to Paola Branduardi, [paola.branduardi@unimib.it](mailto:paola.branduardi@unimib.it)

**Table S1.** Control-specific genes.

| <b>ID</b> | <b>NCBI_ID</b> | <b>Description</b>                                                                                              |
|-----------|----------------|-----------------------------------------------------------------------------------------------------------------|
| A00140_N  | BZL39_A00140   | related to L-lactate dehydrogenase                                                                              |
| A01200_B  | BZL39_A01200   | uncharacterized protein ZBAI_04890                                                                              |
| A02950_B  | BZL39_A02950   | uncharacterized protein ZBAI_04711                                                                              |
| A04460_B  | BZL39_A04460   | related to PCH2- ATPase                                                                                         |
| A05220_N  | BZL39_A05220   | uncharacterized protein ZBAI_04496                                                                              |
| A09510_B  | BZL39_A09510   | related to IRC11-Strong similarity to YDR391c                                                                   |
| A09995_N  | BZL39_A09995   | ---NA---                                                                                                        |
| A10080_N  | BZL39_A10080   | ZYBA0S13-00232g1_1                                                                                              |
| B03300_A  | BZL39_B03300   | ZYBA0S04-07030g1_1                                                                                              |
| B09380_A  | BZL39_B09380   | A Chain Crystal Structure Of Yth Domain Of Zygosaccharomyces rouxii Mrb1 In Complex With N6-methyladenosine RNA |
| B09470_A  | BZL39_B09470   | related to IRC11-Strong similarity to YDR391c                                                                   |
| B09730_A  | BZL39_B09730   | ZYBA0S13-00980g1_1                                                                                              |
| B10130_N  | BZL39_B10130   | CIC11C00000000719                                                                                               |
| C03800_A  | BZL39_C03800   | BN860_11408g1_1                                                                                                 |
| D01770_B  | BZL39_D01770   | uncharacterized protein ZBAI_02445                                                                              |
| E02670_A  | BZL39_E02670   | BN860_10704g1_1                                                                                                 |
| E07220_N  | BZL39_E07220   | Y element ATP-dependent helicase                                                                                |
| G06420_N  | BZL39_G06420   | related to ketopantoate reductase                                                                               |
| H01670_B  | BZL39_H01670   | uncharacterized protein ZBAI_06090                                                                              |
| H04800_B  | BZL39_H04800   | uncharacterized protein ZBAI_05789                                                                              |
| H06370_A  | BZL39_H06370   | related to ornithine aminotransferase                                                                           |
| I04800_A  | BZL39_I04800   | related to Peroxisomal membrane PAS20                                                                           |
| J00180_N  | BZL39_J00180   | related to ornithine aminotransferase                                                                           |
| J03940_A  | BZL39_J03940   | cell wall CWP1                                                                                                  |
| K04960_A  | BZL39_K04960   | probable OPT1-High-affinity glutathione transporter                                                             |
| K05090_N  | BZL39_K05090   | related to permease of the major facilitator superfamily                                                        |
| M00100_N  | BZL39_M00100   | Y element ATP-dependent helicase                                                                                |
| M00110_N  | BZL39_M00110   | Y element ATP-dependent helicase 1 copy 6                                                                       |
| M00290_N  | BZL39_M00290   | related to ornithine aminotransferase                                                                           |
| N00210_N  | BZL39_N00210   | related to MFS multidrug transporter                                                                            |
| N05030_A  | BZL39_N05030   | related to Peroxisomal membrane PAS20                                                                           |

**Table S2.** Lactic acid-specific genes.

| <b>ID</b>  | <b>NCBI_ID</b> | <b>Description</b>                           |
|------------|----------------|----------------------------------------------|
| A00170_N   | BZL39_A00170   | threonine dehydratase                        |
| A00180_A   | BZL39_A00180   | probable Allantoate permease                 |
| A00210_B   | BZL39_A00210   | probable Constitutive acid phosphatase       |
| A00290_A   | BZL39_A00290   | related to thermophilic desulfurizing enzyme |
| A05200_N   | BZL39_A05200   | uncharacterized protein ZBAI_04498           |
| A07530_B   | BZL39_A07530   | uncharacterized protein ZBAI_04271           |
| A09010_N   | BZL39_A09010   | uncharacterized protein ZBAI_08640           |
| A10020_N   | BZL39_A10020   | Fit2p                                        |
| A10040_B   | BZL39_A10040   | related to Siderophore iron transporter 3    |
| B00200_A   | BZL39_B00200   | related to ketopantoate reductase            |
| B10000_A   | BZL39_B10000   | related to Siderophore iron transporter 3    |
| C00430_A   | BZL39_C00430   | BN860_18976g1_1                              |
| C05100_A   | BZL39_C05100   | BN860_08460g1_1                              |
| E00130_A   | BZL39_E00130   | BN860_16600g1_1                              |
| E01370_A   | BZL39_E01370   | related to Similarity to YIL123w and Sun4p   |
| E02440_A   | BZL39_E02440   | BN860_11232g1_1                              |
| E06720_A   | BZL39_E06720   | BN860_01398g1_1                              |
| F06250_N   | BZL39_F06250   | probable Vacuolar sorting targeting 10       |
| G00240_N   | BZL39_G00240   | Fit2p                                        |
| G01010_A   | BZL39_G01010   | Gor1p                                        |
| J00140_N   | BZL39_J00140   | 1-aminocyclopropane-1-carboxylate deaminase  |
| J05500_A   | BZL39_J05500   | ZYBA0S03-00892g1_1                           |
| K00230_N   | BZL39_K00230   | uncharacterized protein ZBAI_09841           |
| K05040_N   | BZL39_K05040   | ZYBA0S13-00144g1_1                           |
| K05170_A   | BZL39_K05170   | related to ketopantoate reductase            |
| L05300_N   | BZL39_L05300   | related to Soluble epoxide hydrolase         |
| M00150_N   | BZL39_M00150   | uncharacterized protein ZBAI_01365           |
| M00180_N   | BZL39_M00180   | uncharacterized protein ZBAI_01367           |
| M00220_N   | BZL39_M00220   | related to MFS multidrug transporter         |
| N00200_N   | BZL39_N00200   | Hxt3p                                        |
| N00290_A   | BZL39_N00290   | probable Fluconazole resistance 1            |
| O04150_N   | BZL39_O04150   | uncharacterized protein ZBAI_08167           |
| O04170_A   | BZL39_O04170   | related to Arsenical-resistance 3            |
| P00180_N   | BZL39_P00180   | Fit2p                                        |
| P02220_N   | BZL39_P02220   | Fdh1p                                        |
| ZPARMT0022 | BZL39_MT0022   | NA                                           |

Supplemental file 2: **Data Set S1.** Full annotation table for the *Z. parabailii* genome. The table includes the *Z. parabailii* gene codes, their corresponding *Z. bailii* homeolog (if any), the *S. cerevisiae* homolog(s) (if any), and the gene category as reported in Ortiz-Merino *et al.* 2017 (1). It also includes the PFAM (2) category and a logical column TM indicating if the gene has more than 2 transmembrane domains and has hits in TransportDB (3) as described in the method section. The names and systematic IDs for the corresponding *S. cerevisiae* homologs assigned by YGAP (4) are also included with a link to their description in the Saccharomyces Genome Database (<http://www.yeastgenome.org>).

Supplemental file 3: **Data Set S2.** *Z. parabailii* functional annotation obtained using Blast2GO (5). The table includes a brief description of the best blast (6) hit including the number of hits and e-Value found by Blast2GO as described in the software documentation. In addition, it shows the assigned Gene Ontology terms and Enzyme Classification codes with a brief description.

Supplemental file 4: **Data Set S3.** Averaged Reads Per Kilobase of transcript per Million mapped reads (RPKM) values for homeolog gene pairs. Columns are labels as C or LA corresponding to control or lactic acid and 18 or 42 corresponding to the timepoint. Columns with the suffix \_A correspond to the A gene similar to \_B and B genes.

Supplemental file 5: **Data Set S4.** Duplicated genes differentially expressed during lactic acid exposure. In separate sheets, the *Z. parabailii* duplicated genes found as up- or downregulated in the different time points. Each sheet includes the corresponding statistical values obtained for each gene from the Limma-Voom analysis (7, 8) and the functional metadata described in the methods section.

Supplemental file 6: **Data Set S5.** Differentially expressed genes during lactic acid exposure. In separate sheets, the *Z. parabailii* genes found as up- or downregulated in the different time points. Each sheet includes the corresponding statistical values obtained for each gene from the Limma-Voom (7, 8) analysis and the functional metadata described in the methods section. Enriched GO terms amongst the differentially expressed genes. In separate sheets, the terms found as enriched with an adjusted P value  $\leq 0.05$  using goseq (9) for the upregulated and downregulated gene sets. The value was  $\log_{10}$  transformed to facilitate visual interpretation and it is shown when obtained at each individual time point or both.

Supplemental file 7: **Data Set S6.** Enriched GO terms among differentially expressed genes. In separate sheets, the terms found as enriched with an adjusted P value  $\leq 0.05$  using goseq (9) for the upregulated and downregulated gene sets. The value was  $\log_{10}$  transformed to facilitate visual interpretation and it is shown when obtained at each individual time point or both.

Supplemental file 8: **Data Set S7.** List of differentially expressed genes controlled by Haa1 and Aft1/2. *Z. parabailii* genes whose *S. cerevisiae* homolog is under control of either Haa1 or Aft1/2 according to YEASTRACT (10). The  $\log_2$ -fold change values are shown in the case they were found as differentially expressed at 18 h or 42 h. The *S. cerevisiae* standard or systematic names are shown including the corresponding paralog if there is any.

## References

1. **Ortiz-Merino RA, Kuanyshev N, Braun-Galleani S, Byrne KP, Porro D, Branduardi P, Wolfe KH.** 2017. Evolutionary restoration of fertility in an interspecies hybrid yeast, by whole-genome duplication after a failed mating-type switch. *PLoS Biol* **15**:e2002128.
2. **Finn RD, Bateman A, Clements J, Coggill P, Eberhardt RY, Eddy SR, Heger A, Hetherington K, Holm L, Mistry J, Sonnhammer EL, Tate J, Punta M.** 2014. Pfam: the protein families database. *Nucleic Acids Res* **42**:D222-230.
3. **Elbourne LD, Tetu SG, Hassan KA, Paulsen IT.** 2017. TransportDB 2.0: a database for exploring membrane transporters in sequenced genomes from all domains of life. *Nucleic Acids Res* **45**:D320-D324.
4. **Proux-Wera E, Armisen D, Byrne KP, Wolfe KH.** 2012. A pipeline for automated annotation of yeast genome sequences by a conserved-synteny approach. *BMC Bioinformatics* **13**:237.
5. **Gotz S, Garcia-Gomez JM, Terol J, Williams TD, Nagaraj SH, Nueda MJ, Robles M, Talon M, Dopazo J, Conesa A.** 2008. High-throughput functional annotation and data mining with the Blast2GO suite. *Nucleic Acids Res* **36**:3420-3435.
6. **Altschul SF, Gish W, Miller W, Myers EW, Lipman DJ.** 1990. Basic local alignment search tool. *J Mol Biol* **215**:403-410.
7. **Ritchie ME, Phipson B, Wu D, Hu Y, Law CW, Shi W, Smyth GK.** 2015. limma powers differential expression analyses for RNA-sequencing and microarray studies. *Nucleic Acids Res* **43**:e47.
8. **Law CW, Chen Y, Shi W, Smyth GK.** 2014. voom: Precision weights unlock linear model analysis tools for RNA-seq read counts. *Genome Biol* **15**:R29.
9. **Young MD, Wakefield MJ, Smyth GK, Oshlack A.** 2010. Gene ontology analysis for RNA-seq: accounting for selection bias. *Genome Biol* **11**:R14.
10. **Teixeira MC, Monteiro P, Jain P, Tenreiro S, Fernandes AR, Mira NP, Alenquer M, Freitas AT, Oliveira AL, Sa-Correia I.** 2006. The YEASTRACT database: a tool for the analysis of transcription regulatory associations in *Saccharomyces cerevisiae*. *Nucleic Acids Res* **34**:D446-451.
